# Supplementary material for: Contrasting nursery habitats promote variations in the bioenergetic condition of juvenile female red squat lobsters (Pleuroncodes monodon) of the Southern Pacific Ocean
Source: PeerJ. 2022 May 4;10:e13393. doi: 10.7717/peerj.13393 (PMC9078136; doi:10.7717/peerj.13393)
Supplement: Supplemental Information 1 — Data of sea surface temperature and chlorophyll-a off the coast of Coquimbo and Concepción, Chile [file peerj-10-13393-s001.xlsx]

## Sheet: GAM
Month	Coquimbo SST (°C)	Concepción SST (°C)	Coquimbo Chl-a (mg m3)	Concepción Chl-a (mg m3)			Locality	Month	SST	Chl-a			Month	SST-NFU	SST-SFU	Chl-a-NFU	Chl-a-SFU
1	18.61	14.8675	1.78032	1.33302			1	1	18.61	1.78032			1	18.61	14.8675	1.78032	1.33302
1	18.83	17.5875	1.49364	2.96385			1	1	18.83	1.49364			1	18.83	17.5875	1.49364	2.96385
1	18.42	17.425	0.93623	1.2846			1	1	18.42	0.93623			1	18.42	17.425	0.93623	1.2846
1	18.82	17.295	0.400016	1.63988			1	1	18.82	0.400016			1	18.82	17.295	0.400016	1.63988
2	20.72	15.0925	0.389386	3.01915			1	2	20.72	0.389386			2	20.72	15.0925	0.389386	3.01915
2	17.465	15.7075	0.796363	1.23632			1	2	17.465	0.796363			2	17.465	15.7075	0.796363	1.23632
2	17.45	14.695	1.14603	1.63106			1	2	17.45	1.14603			2	17.45	14.695	1.14603	1.63106
2	17.31	14.5225	0.801866	1.72845			1	2	17.31	0.801866			2	17.31	14.5225	0.801866	1.72845
3	18.685	14.3075	0.753874	3.26622			1	3	18.685	0.753874			3	18.685	14.3075	0.753874	3.26622
3	17.845	14.15	1.59242	2.85612			1	3	17.845	1.59242			3	17.845	14.15	1.59242	2.85612
3	19.39	14.0425	0.634377	1.60868			1	3	19.39	0.634377			3	19.39	14.0425	0.634377	1.60868
3	17.605	14.2	0.90225	2.74171			1	3	17.605	0.90225			3	17.605	14.2	0.90225	2.74171
4	18.285	14.05	0.606725	1.09972			1	4	18.285	0.606725			4	18.285	14.05	0.606725	1.09972
4	15.505	13.9425	0.288424	0.780017			1	4	15.505	0.288424			4	15.505	13.9425	0.288424	0.780017
4	15.025	14.2925	0.654669	0.691039			1	4	15.025	0.654669			4	15.025	14.2925	0.654669	0.691039
4	16.815	14.4444	0.623949	0.723444			1	4	16.815	0.623949			4	16.815	14.4444	0.623949	0.723444
5	15.689	14.8453	0.697333	0.766666			1	5	15.689	0.697333			5	15.689	14.8453	0.697333	0.766666
5	15.82	14.93	0.744869	0.7478			1	5	15.82	0.744869			5	15.82	14.93	0.744869	0.7478
5	15.335	14.7644	0.740898	0.831346			1	5	15.335	0.740898			5	15.335	14.7644	0.740898	0.831346
6	14.47	14.38	1.81854	1.13673			1	6	14.47	1.81854			6	14.47	14.38	1.81854	1.13673
6	14.105	14.2725	0.911476	0.77493			1	6	14.105	0.911476			6	14.105	14.2725	0.911476	0.77493
6	13.44	13.4125	0.934746	0.845467			1	6	13.44	0.934746			6	13.44	13.4125	0.934746	0.845467
6	13.14	12.82	0.994433	2.75978			1	6	13.14	0.994433			6	13.14	12.82	0.994433	2.75978
7	15.09	12.3175	0.410955	0.670473			1	7	15.09	0.410955			7	15.09	12.3175	0.410955	0.670473
7	14.04	12.865	0.776256	0.843289			1	7	14.04	0.776256			7	14.04	12.865	0.776256	0.843289
7	14.415	12.4313	0.562123	0.935529			1	7	14.415	0.562123			7	14.415	12.4313	0.562123	0.935529
7	13.99	12.825	0.502574	1.02798			1	7	13.99	0.502574			7	13.99	12.825	0.502574	1.02798
8	13.475	13.185	0.511606	0.994802			1	8	13.475	0.511606			8	13.475	13.185	0.511606	0.994802
8	13.595	13.03	0.750098	1.51549			1	8	13.595	0.750098			8	13.595	13.03	0.750098	1.51549
8	13.46	12.74	1.44938	2.32982			1	8	13.46	1.44938			8	13.46	12.74	1.44938	2.32982
8	13.542	12.225	4.74448	1.43655			1	8	13.542	4.74448			8	13.542	12.225	4.74448	1.43655
9	13.385	13.085	0.827123	2.6974			1	9	13.385	0.827123			9	13.385	13.085	0.827123	2.6974
9	13.73	13.1275	1.64549	0.807959			1	9	13.73	1.64549			9	13.73	13.1275	1.64549	0.807959
9	13.85	12.775	1.10386	3.64893			1	9	13.85	1.10386			9	13.85	12.775	1.10386	3.64893
9	13.92	13.3925	0.962686	1.60137			1	9	13.92	0.962686			9	13.92	13.3925	0.962686	1.60137
10	13.515	13.21	0.788699	0.790569			1	10	13.515	0.788699			10	13.515	13.21	0.788699	0.790569
10	14.055	13.295	3.57762	0.496439			1	10	14.055	3.57762			10	14.055	13.295	3.57762	0.496439
10	14.89	13.3075	1.43624	0.58867			1	10	14.89	1.43624			10	14.89	13.3075	1.43624	0.58867
10	14.31	13.9625	1.20989	0.659562			1	10	14.31	1.20989			10	14.31	13.9625	1.20989	0.659562
11	14.74	12.835	2.06936	4.4306			1	11	14.74	2.06936			11	14.74	12.835	2.06936	4.4306
11	16.705	12.2775	0.800208	7.28169			1	11	16.705	0.800208			11	16.705	12.2775	0.800208	7.28169
11	17.79	14.5775	0.538473	0.966103			1	11	17.79	0.538473			11	17.79	14.5775	0.538473	0.966103
12	17.97	14.69	2.20332	1.37539			1	12	17.97	2.20332			12	17.97	14.69	2.20332	1.37539
12	16.875	14.3625	1.68297	1.70072			1	12	16.875	1.68297			12	16.875	14.3625	1.68297	1.70072
12	15.84	14.265	1.64526	2.59707			1	12	15.84	1.64526			12	15.84	14.265	1.64526	2.59707
12	18.1	15.7225	2.1226	1.80039			1	12	18.1	2.1226			12	18.1	15.7225	2.1226	1.80039
							2	1	14.8675	1.33302
							2	1	17.5875	2.96385
							2	1	17.425	1.2846
							2	1	17.295	1.63988
							2	2	15.0925	3.01915
							2	2	15.7075	1.23632
							2	2	14.695	1.63106
							2	2	14.5225	1.72845
							2	3	14.3075	3.26622
							2	3	14.15	2.85612
							2	3	14.0425	1.60868
							2	3	14.2	2.74171
							2	4	14.05	1.09972
							2	4	13.9425	0.780017
							2	4	14.2925	0.691039
							2	4	14.4444	0.723444
							2	5	14.8453	0.766666
							2	5	14.93	0.7478
							2	5	14.7644	0.831346
							2	6	14.38	1.13673
							2	6	14.2725	0.77493
							2	6	13.4125	0.845467
							2	6	12.82	2.75978
							2	7	12.3175	0.670473
							2	7	12.865	0.843289
							2	7	12.4313	0.935529
							2	7	12.825	1.02798
							2	8	13.185	0.994802
							2	8	13.03	1.51549
							2	8	12.74	2.32982
							2	8	12.225	1.43655
							2	9	13.085	2.6974
							2	9	13.1275	0.807959
							2	9	12.775	3.64893
							2	9	13.3925	1.60137
							2	10	13.21	0.790569
							2	10	13.295	0.496439
							2	10	13.3075	0.58867
							2	10	13.9625	0.659562
							2	11	12.835	4.4306
							2	11	12.2775	7.28169
							2	11	14.5775	0.966103
							2	12	14.69	1.37539
							2	12	14.3625	1.70072
							2	12	14.265	2.59707
							2	12	15.7225	1.80039

## Sheet: Summary table
	Fishing unit	Environmental variable	January	February	March	April	May	June	July	August	September	October	November	December
	NFU	SST (°C)	18.67 ± 0.1	18.24 ± 0.83	18.38 ± 0.41	16.41 ±0.73	15.62 ± 0.14	13.79 ± 0.3	14.38 ± 0.25	13.52 ± 0.03	13.72 ± 0.12	14.19 ± 0.29	16.41 ± 0.89	17.2 ± 0.53
		Chl-a (mg m3)	1.15 ± 0.31	0.78 ± 0.15	0.97 ± 0.21	0.54 ± 0.09	0.73 ± 0.02	1.16 ± 0.22	0.56 ± 0.08	1.86 ± 0.98	1.13 ± 0.18	1.75 ± 0.62	1.14 ± 0.47	1.19 ± 0.15
	SFU	SST (°C)	16.79 ± 0.64	15 ± 0.26	14.17 ± 0.06	14.18 ± 0.11	14.84 ± 0.05	13.72 ± 0.37	12.61 ± 0.14	12.79 ± 0.21	13.09 ± 0.13	13.44 ± 0.17	13.23 ± 0.69	14.76 ± 0.33
		Chl-a (mg m3)	1.81 ± 0.39	1.9 ± 0.39	2.62 ± 0.35	0.82 ± 0.09	0.78 ± 0.03	1.38 ± 0.47	0.87 ± 0.08	1.57 ± 0.28	2.19 ± 0.62	0.63 ± 0.06	4.23 ± 1.83	1.87 ± 0.26
		SST Coquimbo	January	February	March	April	May	June	July	August	September	October	November	December
		Mean	18.67	18.2362	18.3812	16.4075	15.6147	13.7887	14.3837	13.518	13.7212	14.1925	16.4117	17.1962
		s.d.	0.195107	1.6573	0.81649	1.46252	0.250899	0.607349	0.507598	0.0624978	0.2375	0.57103	1.54601	1.058
		s.e.	0.0975534	0.828652	0.408245	0.731259	0.144857	0.303675	0.253799	0.0312489	0.11875	0.285515	0.892591	0.528998
		Chl-a Coquimbo	January	February	March	April	May	June	July	August	September	October	November	December
		Mean	1.15255	0.783411	0.970731	0.543442	0.7277	1.1648	0.562977	1.86389	1.13479	1.75311	1.13602	1.91354
		s.d.	0.611976	0.309439	0.428701	0.171164	0.0263731	0.437224	0.155186	1.96119	0.358723	1.24558	0.81883	0.290295
		s.e.	0.305988	0.15472	0.214351	0.0855822	0.0152265	0.218612	0.0775928	0.980595	0.179361	0.622791	0.472752	0.145147
		SST Concepción	January	February	March	April	May	June	July	August	September	October	November	December
		Mean	16.7937	15.0044	14.175	14.1824	14.8465	13.7212	12.6097	12.795	13.095	13.4437	13.23	14.76
		s.d.	1.28973	0.526013	0.110095	0.227941	0.0828313	0.740587	0.276118	0.422394	0.253023	0.348535	1.1998	0.666917
		s.e.	0.644865	0.263006	0.0550474	0.113971	0.0478227	0.370293	0.138059	0.211197	0.126512	0.174268	0.692704	0.333459
		Chl-a Concepción	January	February	March	April	May	June	July	August	September	October	November	December
		Mean	1.80534	1.90375	2.61818	0.823554	0.781937	1.37923	0.869318	1.56917	2.18892	0.63381	4.22613	1.86839
		s.d.	0.788201	0.773445	0.709677	0.187744	0.0438164	0.933598	0.152506	0.556464	1.24398	0.124023	3.16275	0.518576
		s.e.	0.394101	0.386723	0.354838	0.093872	0.0252974	0.466799	0.0762532	0.278232	0.62199	0.0620114	1.82602	0.259288

## Sheet: SST_Coquimbo_2016
Title:,"Time Series, Area-Averaged of Sea Surface Temperature at 11 microns (Day) 8-daily 4 km [MODIS-Aqua ()"										-71.6638,-30.0133,-71.6116,-29.9638
User Start Date:,2016-01-01T00:00:00Z
User End Date:,2016-12-31T23:59:59Z
User Bounding Box:,"-71.6638,-30.0133,-71.6116,-29.9638"
Data Bounding Box:,"-71.6458,-29.9792,-71.6458,-29.9792"
URL to Reproduce Results:,"https://giovanni.gsfc.nasa.gov/giovanni/#service=ArAvTs&starttime=2016-01-01T00:00:00Z&endtime=2016-12-31T23:59:59Z&bbox=-71.6638,-30.0133,-71.6116,-29.9638&data=MODISA_L3m_SST_8d_4km_R2019_0_sst&variableFacets=dataFieldMeasurement%3ASea%20Surface%20Temperature%3B&portal=GIOVANNI&format=json"
Fill Value (mean_MODISA_L3m_SST_8d_4km_R2019_0_sst):, -32767
time, mean_MODISA_L3m_SST_8d_4km_R2019_0_sst		SST
2016-01-01 00:15:01		18.61		Mean	18.67		SST Coquimbo	January	February	March	April	May	June	July	August	September	October	November	December
2016-01-09 00:30:01		18.83		s.d.	0.195107		Mean	18.67	18.2362	18.3812	16.4075	15.6147	13.7887	14.3837	13.518	13.7212	14.1925	16.4117	17.1962
2016-01-17 00:15:00		18.42		s.e.	0.0975534		s.d.	0.195107	1.6573	0.81649	1.46252	0.250899	0.607349	0.507598	0.0624978	0.2375	0.57103	1.54601	1.058
2016-01-25 00:30:01		18.82					s.e.	0.0975534	0.828652	0.408245	0.731259	0.144857	0.303675	0.253799	0.0312489	0.11875	0.285515	0.892591	0.528998
2016-02-02 00:15:00		20.72		Mean	18.2362
2016-02-10 00:30:01		17.465		s.d.	1.6573
2016-02-18 00:15:01		17.45		s.e.	0.828652
2016-02-26 00:30:00		17.31
2016-03-05 00:15:01		18.685		Mean	18.3812
2016-03-13 00:30:00		17.845		s.d.	0.81649
2016-03-21 00:15:01		19.39		s.e.	0.408245
2016-03-29 00:30:00		17.605
2016-04-06 00:15:01		18.285		Mean	16.4075
2016-04-14 00:55:01		15.505		s.d.	1.46252
2016-04-22 00:15:00		15.025		s.e.	0.731259
2016-04-30 00:55:01		16.815
2016-05-08 00:15:00,-32767		15.689		Mean	15.6147
2016-05-16 00:55:01		15.82		s.d.	0.250899
2016-05-24 00:15:00		15.335		s.e.	0.144857
2016-06-01 00:55:01		14.47		Mean	13.7887
2016-06-09 00:15:00		14.105		s.d.	0.607349
2016-06-17 00:55:01		13.44		s.e.	0.303675
2016-06-25 00:15:00		13.14
2016-07-03 00:55:01		15.09		Mean	14.3837
2016-07-11 00:15:00		14.04		s.d.	0.507598
2016-07-19 00:55:01		14.415		s.e.	0.253799
2016-07-27 00:15:00		13.99
2016-08-04 00:55:00		13.475		Mean	13.518
2016-08-12 00:20:01		13.595		s.d.	0.0624978
2016-08-20 00:55:00		13.46		s.e.	0.0312489
2016-08-28 00:15:01		13.542
2016-09-05 00:30:01		13.385		Mean	13.7212
2016-09-13 00:15:01		13.73		s.d.	0.2375
2016-09-21 00:30:01,-32767		13.85		s.e.	0.11875
2016-09-29 00:15:01		13.92
2016-10-07 00:30:01		13.515		Mean	14.1925
2016-10-15 00:15:01		14.055		s.d.	0.57103
2016-10-23 00:30:01		14.89		s.e.	0.285515
2016-10-31 00:15:01		14.31
2016-11-08 00:30:01		14.74		Mean	16.4117
2016-11-16 00:15:00		16.705		s.d.	1.54601
2016-11-24 00:30:01		17.79		s.e.	0.892591
2016-12-02 00:15:00		17.97
2016-12-10 00:30:00		16.875		Mean	17.1962
2016-12-18 00:15:01		15.84		s.d.	1.058
2016-12-26 00:30:00		18.1		s.e.	0.528998

## Sheet: SST_Concepción_2016
Title:,"Time Series, Area-Averaged of Sea Surface Temperature at 11 microns (Day) 8-daily 4 km [MODIS-Aqua ()"
User Start Date:,2016-01-01T00:00:00Z
User End Date:,2016-12-31T23:59:59Z
User Bounding Box:,"-73.4848,-36.3886,-73.4161,-36.3281"
Data Bounding Box:,"-73.4792,-36.3542,-73.4375,-36.3542"
URL to Reproduce Results:,"https://giovanni.gsfc.nasa.gov/giovanni/#service=ArAvTs&starttime=2016-01-01T00:00:00Z&endtime=2016-12-31T23:59:59Z&bbox=-73.4848,-36.3886,-73.4161,-36.3281&data=MODISA_L3m_SST_8d_4km_R2019_0_sst&variableFacets=dataFieldMeasurement%3ASea%20Surface%20Temperature%3B&portal=GIOVANNI&format=json"
Fill Value (mean_MODISA_L3m_SST_8d_4km_R2019_0_sst):, -32767
time, mean_MODISA_L3m_SST_8d_4km_R2019_0_sst		SST					SST Concepción	January	February	March	April	May	June	July	August	September	October	November	December
2016-01-01 00:15:01		14.8675		Mean	16.7937		Mean	16.7937	15.0044	14.175	14.1824	14.8465	13.7212	12.6097	12.795	13.095	13.4437	13.23	14.76
2016-01-09 00:30:01		17.5875		s.d.	1.28973		s.d.	1.28973	0.526013	0.110095	0.227941	0.0828313	0.740587	0.276118	0.422394	0.253023	0.348535	1.1998	0.666917
2016-01-17 00:15:00		17.425		s.e.	0.644865		s.e.	0.644865	0.263006	0.0550474	0.113971	0.0478227	0.370293	0.138059	0.211197	0.126512	0.174268	0.692704	0.333459
2016-01-25 00:30:01		17.295
2016-02-02 00:15:00		15.0925		Mean	15.0044
2016-02-10 00:30:01		15.7075		s.d.	0.526013
2016-02-18 00:15:01		14.695		s.e.	0.263006
2016-02-26 00:30:00		14.5225
2016-03-05 00:15:01		14.3075		Mean	14.175
2016-03-13 00:30:00		14.15		s.d.	0.110095
2016-03-21 00:15:01		14.0425		s.e.	0.0550474
2016-03-29 00:30:00		14.2
2016-04-06 00:15:01		14.05		Mean	14.1824
2016-04-14 00:55:01		13.9425		s.d.	0.227941
2016-04-22 00:15:00		14.2925		s.e.	0.113971
2016-04-30 00:55:01,-32767		14.4444
2016-05-08 00:15:00,-32767		14.8453		Mean	14.8465
2016-05-16 00:55:01		14.93		s.d.	0.0828313
2016-05-24 00:15:00,-32767		14.7644		s.e.	0.0478227
2016-06-01 00:55:01		14.38		Mean	13.7212
2016-06-09 00:15:00		14.2725		s.d.	0.740587
2016-06-17 00:55:01		13.4125		s.e.	0.370293
2016-06-25 00:15:00		12.82
2016-07-03 00:55:01		12.3175		Mean	12.6097
2016-07-11 00:15:00		12.865		s.d.	0.276118
2016-07-19 00:55:01,-32767		12.4313		s.e.	0.138059
2016-07-27 00:15:00		12.825
2016-08-04 00:55:00		13.185		Mean	12.795
2016-08-12 00:20:01		13.03		s.d.	0.422394
2016-08-20 00:55:00		12.74		s.e.	0.211197
2016-08-28 00:15:01		12.225
2016-09-05 00:30:01		13.085		Mean	13.095
2016-09-13 00:15:01		13.1275		s.d.	0.253023
2016-09-21 00:30:01		12.775		s.e.	0.126512
2016-09-29 00:15:01		13.3925
2016-10-07 00:30:01		13.21		Mean	13.4437
2016-10-15 00:15:01		13.295		s.d.	0.348535
2016-10-23 00:30:01		13.3075		s.e.	0.174268
2016-10-31 00:15:01		13.9625
2016-11-08 00:30:01		12.835		Mean	13.23
2016-11-16 00:15:00		12.2775		s.d.	1.1998
2016-11-24 00:30:01		14.5775		s.e.	0.692704
2016-12-02 00:15:00		14.69
2016-12-10 00:30:00		14.3625		Mean	14.76
2016-12-18 00:15:01		14.265		s.d.	0.666917
2016-12-26 00:30:00		15.7225		s.e.	0.333459

## Sheet: Chl-a_Coquimbo_2016
Title:,"Time Series, Area-Averaged of Chlorophyll a concentration 8-daily 4 km [MODIS-Aqua MODISA_L3m_CHL_8d_4km ()"
User Start Date:,2016-01-01T00:00:00Z
User End Date:,2016-12-31T23:59:59Z
User Bounding Box:,"-71.6638,-30.0133,-71.6116,-29.9638"
Data Bounding Box:,"-71.6458,-29.9792,-71.6458,-29.9792"
URL to Reproduce Results:,"https://giovanni.gsfc.nasa.gov/giovanni/#service=ArAvTs&starttime=2016-01-01T00:00:00Z&endtime=2016-12-31T23:59:59Z&bbox=-71.6638,-30.0133,-71.6116,-29.9638&data=MODISA_L3m_CHL_8d_4km_2018_chlor_a&variableFacets=dataFieldMeasurement%3AChlorophyll%3B&portal=GIOVANNI&format=json"
Fill Value (mean_MODISA_L3m_CHL_8d_4km_2018_chlor_a):, -32767
time, mean_MODISA_L3m_CHL_8d_4km_2018_chlor_a		Chl-a					Chl-a Coquimbo	January	February	March	April	May	June	July	August	September	October	November	December
2016-01-01 00:15:01		1.78032		Mean	1.15255		Mean	1.15255	0.783411	0.970731	0.543442	0.7277	1.1648	0.562977	1.86389	1.13479	1.75311	1.13602	1.91354
2016-01-09 00:30:01		1.49364		s.d.	0.611976		s.d.	0.611976	0.309439	0.428701	0.171164	0.0263731	0.437224	0.155186	1.96119	0.358723	1.24558	0.81883	0.290295
2016-01-17 00:15:00		0.93623		s.e.	0.305988		s.e.	0.305988	0.15472	0.214351	0.0855822	0.0152265	0.218612	0.0775928	0.980595	0.179361	0.622791	0.472752	0.145147
2016-01-25 00:30:01		0.400016
2016-02-02 00:15:00		0.389386		Mean	0.783411
2016-02-10 00:30:01		0.796363		s.d.	0.309439
2016-02-18 00:15:01		1.14603		s.e.	0.15472
2016-02-26 00:30:00		0.801866
2016-03-05 00:15:01		0.753874		Mean	0.970731
2016-03-13 00:30:00		1.59242		s.d.	0.428701
2016-03-21 00:15:01		0.634377		s.e.	0.214351
2016-03-29 00:30:00		0.90225
2016-04-06 00:15:01		0.606725		Mean	0.543442
2016-04-14 00:55:01		0.288424		s.d.	0.171164
2016-04-22 00:15:00		0.654669		s.e.	0.0855822
2016-04-30 00:55:01,-32767		0.623949
2016-05-08 00:15:00,-32767		0.697333		Mean	0.7277
2016-05-16 00:55:01		0.744869		s.d.	0.0263731
2016-05-24 00:15:00		0.740898		s.e.	0.0152265
2016-06-01 00:55:01		1.81854		Mean	1.1648
2016-06-09 00:15:00		0.911476		s.d.	0.437224
2016-06-17 00:55:01,-32767		0.934746		s.e.	0.218612
2016-06-25 00:15:00		0.994433
2016-07-03 00:55:01		0.410955		Mean	0.562977
2016-07-11 00:15:00		0.776256		s.d.	0.155186
2016-07-19 00:55:01		0.562123		s.e.	0.0775928
2016-07-27 00:15:00		0.502574
2016-08-04 00:55:00		0.511606		Mean	1.86389
2016-08-12 00:15:00		0.750098		s.d.	1.96119
2016-08-20 00:55:00		1.44938		s.e.	0.980595
2016-08-28 00:15:01		4.74448
2016-09-05 00:30:01		0.827123		Mean	1.13479
2016-09-13 00:15:01		1.64549		s.d.	0.358723
2016-09-21 00:30:01,-32767		1.10386		s.e.	0.179361
2016-09-29 00:15:01		0.962686
2016-10-07 00:30:01		0.788699		Mean	1.75311
2016-10-15 00:15:01		3.57762		s.d.	1.24558
2016-10-23 00:30:01		1.43624		s.e.	0.622791
2016-10-31 00:15:01		1.20989
2016-11-08 00:30:01		2.06936		Mean	1.13602
2016-11-16 00:15:00		0.800208		s.d.	0.81883
2016-11-24 00:30:01		0.538473		s.e.	0.472752
2016-12-02 00:15:00		2.20332
2016-12-10 00:30:00		1.68297		Mean	1.91354
2016-12-18 00:15:01		1.64526		s.d.	0.290295
2016-12-26 00:30:00		2.1226		s.e.	0.145147

## Sheet: Chl-a_Concepción_2016
Title:,"Time Series, Area-Averaged of Chlorophyll a concentration 8-daily 4 km [MODIS-Aqua MODISA_L3m_CHL_8d_4km ()"
User Start Date:,2016-01-01T00:00:00Z
User End Date:,2016-12-31T23:59:59Z
User Bounding Box:,"-73.4848,-36.3886,-73.4161,-36.3281"
Data Bounding Box:,"-73.4792,-36.3542,-73.4375,-36.3542"
URL to Reproduce Results:,"https://giovanni.gsfc.nasa.gov/giovanni/#service=ArAvTs&starttime=2016-01-01T00:00:00Z&endtime=2016-12-31T23:59:59Z&bbox=-73.4848,-36.3886,-73.4161,-36.3281&data=MODISA_L3m_CHL_8d_4km_2018_chlor_a&variableFacets=dataFieldMeasurement%3AChlorophyll%3B&portal=GIOVANNI&format=json"
Fill Value (mean_MODISA_L3m_CHL_8d_4km_2018_chlor_a):, -32767
time, mean_MODISA_L3m_CHL_8d_4km_2018_chlor_a		Chl-a
2016-01-01 00:15:01		1.33302		Mean	1.80534		Chl-a Concepción	January	February	March	April	May	June	July	August	September	October	November	December
2016-01-09 00:30:01		2.96385		s.d.	0.788201		Mean	1.80534	1.90375	2.61818	0.823554	0.781937	1.37923	0.869318	1.56917	2.18892	0.63381	4.22613	1.86839
2016-01-17 00:15:00		1.2846		s.e.	0.394101		s.d.	0.788201	0.773445	0.709677	0.187744	0.0438164	0.933598	0.152506	0.556464	1.24398	0.124023	3.16275	0.518576
2016-01-25 00:30:01		1.63988					s.e.	0.394101	0.386723	0.354838	0.093872	0.0252974	0.466799	0.0762532	0.278232	0.62199	0.0620114	1.82602	0.259288
2016-02-02 00:15:00		3.01915		Mean	1.90375
2016-02-10 00:30:01		1.23632		s.d.	0.773445
2016-02-18 00:15:01		1.63106		s.e.	0.386723
2016-02-26 00:30:00		1.72845
2016-03-05 00:15:01		3.26622		Mean	2.61818
2016-03-13 00:30:00		2.85612		s.d.	0.709677
2016-03-21 00:15:01		1.60868		s.e.	0.354838
2016-03-29 00:30:00		2.74171
2016-04-06 00:15:01		1.09972		Mean	0.823554
2016-04-14 00:55:01		0.780017		s.d.	0.187744
2016-04-22 00:15:00		0.691039		s.e.	0.093872
2016-04-30 00:55:01,-32767		0.723444
2016-05-08 00:15:00,-32767		0.766666		Mean	0.781937
2016-05-16 00:55:01		0.7478		s.d.	0.0438164
2016-05-24 00:15:00,-32767		0.831346		s.e.	0.0252974
2016-06-01 00:55:01		1.13673		Mean	1.37923
2016-06-09 00:15:00		0.77493		s.d.	0.933598
2016-06-17 00:55:01		0.845467		s.e.	0.466799
2016-06-25 00:15:00		2.75978
2016-07-03 00:55:01		0.670473		Mean	0.869318
2016-07-11 00:15:00		0.843289		s.d.	0.152506
2016-07-19 00:55:01,-32767		0.935529		s.e.	0.0762532
2016-07-27 00:15:00		1.02798
2016-08-04 00:55:00		0.994802		Mean	1.56917
2016-08-12 00:15:00		1.51549		s.d.	0.556464
2016-08-20 00:55:00		2.32982		s.e.	0.278232
2016-08-28 00:15:01		1.43655
2016-09-05 00:30:01		2.6974		Mean	2.18892
2016-09-13 00:15:01		0.807959		s.d.	1.24398
2016-09-21 00:30:01		3.64893		s.e.	0.62199
2016-09-29 00:15:01		1.60137
2016-10-07 00:30:01		0.790569		Mean	0.63381
2016-10-15 00:15:01		0.496439		s.d.	0.124023
2016-10-23 00:30:01		0.58867		s.e.	0.0620114
2016-10-31 00:15:01		0.659562
2016-11-08 00:30:01		4.4306		Mean	4.22613
2016-11-16 00:15:00		7.28169		s.d.	3.16275
2016-11-24 00:30:01		0.966103		s.e.	1.82602
2016-12-02 00:15:00		1.37539
2016-12-10 00:30:00		1.70072		Mean	1.86839
2016-12-18 00:15:01		2.59707		s.d.	0.518576
2016-12-26 00:30:00		1.80039		s.e.	0.259288

## Sheet: Codebook
	Code	Meaning
	SST	Sea Surface Temperature
	Chl-a	Chlorophyll-a
	NFU	Northern Fishing Unit
	SFU	Southern Fishing Unit
	s.d.	Standard deviation
	s.e.	Standard error
