# Supplementary material for: Contrasting nursery habitats promote variations in the bioenergetic condition of juvenile female red squat lobsters (Pleuroncodes monodon) of the Southern Pacific Ocean
Source: PeerJ. 2022 May 4;10:e13393. doi: 10.7717/peerj.13393 (PMC9078136; doi:10.7717/peerj.13393)
Supplement: Supplemental Information 2 — The data set indicates cephalothorax length, dry weight, lipids, protein, glucose, energy content and lipid/protein ratios of visceral and muscle of juvenile female red squat lobster from two breeding areas (off the coasts of Coquimbo and Concepción). [file peerj-10-13393-s002.xlsx]

## Sheet: TDW + CL
		CONCEPCIÓN; SFU					COQUIMBO; NFU
		Code	CL (mm)	TDW (g)	TDW (mg)		Code	CL (mm)	TDW (g)	TDW (mg)
		1	18	0.4317	431.7		1	16	0.3683	368.3
		2	21.4	0.5461	546.1		2	19.4	0.5007	500.7
		3	18.1	0.4155	415.5		3	19.7	0.4398	439.8
		4	18.3	0.3212	321.2		4	19	0.3718	371.8
		5	16.9	0.4489	448.9		5	19.1	0.4374	437.4
		6	19	0.535	535		6	20.6	0.4064	406.4
		7	17	0.3898	389.8		7	17.2	0.4161	416.1
		8	20.8	0.5131	513.1		8	19.3	0.4753	475.3
		9	19.4	0.6694	669.4		9	21	0.3742	374.2
		10	19.1	0.4869	486.9		10	20.5	0.3977	397.7
		11	20.1	0.6557	655.7		11	18	0.5757	575.7
		12	18.2	0.5723	572.3		12	19.1	0.4503	450.3
		13	22	0.6838	683.8		13	21.1	0.5552	555.2
		14	19.2	0.5017	501.7		14	22	0.4984	498.4
		15	20.4	0.5923	592.3		15	19.9	0.5745	574.5
		16	20.2	0.4925	492.5		16	20.2	0.596	596
		17	18	0.3974	397.4		17	18.9	0.6097	609.7
		18	21.3	0.483	483		18	20.4	0.5401	540.1
		19	18.5	0.4301	430.1		19	18.3	0.6022	602.2
		20	19.3	0.627	627		20	22.8	0.4354	435.4
		21	18.7	0.5817	581.7		21	21	0.4398	439.8
		22	20.8	0.6506	650.6		22	21.3	0.4133	413.3
		23	19.2	0.5894	589.4		23	21.1	0.4222	422.2
		24	21.9	0.6403	640.3		24	20.7	0.4318	431.8
		25	18.6	0.6319	631.9		25	20.5	0.363	363
		26	17.4	0.4703	470.3		26	20	0.3979	397.9
		27	20.5	0.5595	559.5		27	20.7	0.4212	421.2
		28	18.1	0.5151	515.1		28	17.9	0.4694	469.4
		29	17.3	0.4652	465.2		29	21.2	0.4882	488.2
		30	18.2	0.6755	675.5		30	20.1	0.3792	379.2
		Mean	19.1967	0.53243	532.43		Mean	19.9	0.461707	461.707
		s.d.	1.44711	0.0972237	97.2237		s.d.	1.45104	0.0759369	75.9369
		Min	16.9	0.3212	321.2		Min	16	0.363	363
		Max	22	0.6838	683.8		Max	22.8	0.6097	609.7

## Sheet: Lipids
only female non ovigerous		Viscera							Muscle								Viscera							Muscle
Concepción; SFU	Sample	Empty bottle (EB; g)	EB + sample (g)	Lipid (g)	Lipid (mg)	Energy (J)		Sample	Empty bottle (EB; g)	EB + sample (g)	Lipid (g)	Lipid (mg)	Energy (J)		Coquimbo; NFU	Sample	Empty bottle (EB; g)	EB + sample (g)	Lipid (g)	Lipid (mg)	Energy (J)		Sample	Empty bottle (EB; g)	EB + sample (g)	Lipid (g)	Lipid (mg)	Energy (J)
	1	11.5251	11.5275	0.0024	2.4	94.896		1	9.0299	9.0312	0.0013	1.3	51.402			1	11.5243	11.5253	0.001	1	39.54		1	11.4247	11.4254	0.0007	0.7	27.678
	2	9.141	9.1437	0.0027	2.7	106.758		2	9.0624	9.0638	0.0014	1.4	55.356			2	11.493	11.4951	0.0021	2.1	83.034		2	11.5212	11.5224	0.0012	1.2	47.448
	3	11.5291	11.5321	0.003	3	118.62		3	11.1988	11.2002	0.0014	1.4	55.356			3	11.5295	11.532	0.0025	2.5	98.85		3	11.5281	11.5295	0.0014	1.4	55.356
	4	9.1347	9.1366	0.0019	1.9	75.126		4	11.1915	11.1926	0.0011	1.1	43.494			4	11.4883	11.4899	0.0016	1.6	63.264		4	11.5325	11.5334	0.0009	0.9	35.586
	5	9.0587	9.0608	0.0021	2.1	83.034		5	11.2457	11.2469	0.0012	1.2	47.448			5	11.4614	11.4625	0.0011	1.1	43.494		5	11.5439	11.5446	0.0007	0.7	27.678
	6	11.2326	11.2362	0.0036	3.6	142.344		6	11.222	11.2237	0.0017	1.7	67.218			6	9.0933	9.0946	0.0013	1.3	51.402		6	9.1012	9.1035	0.0023	1.3	51.402
	7	11.3445	11.3478	0.0033	3.3	130.482		7	11.2846	11.2863	0.0017	1.7	67.218			7	9.0277	9.0303	0.0026	2.6	102.804		7	11.4735	11.4741	0.0006	0.6	23.724
	8	11.2917	11.2946	0.0029	2.9	114.666		8	11.1366	11.1384	0.0018	1.8	71.172			8	8.9999	9.0019	0.002	2	79.08		8	9.0795	9.0801	0.0006	0.6	23.724
	9	11.3728	11.3752	0.0024	2.4	94.896		9	11.3462	11.348	0.0018	1.8	71.172			9	11.0864	11.0881	0.0017	1.7	67.218		9	11.0404	11.0412	0.0008	0.8	31.632
	10	11.2729	11.2751	0.0022	2.2	86.988		10	11.4975	11.4991	0.0016	1.6	63.264			10	11.2597	11.2619	0.0022	2.2	86.988		10	11.0502	11.051	0.0008	0.8	31.632
	11	11.4482	11.4513	0.0031	3.1	122.574		11	11.4755	11.4771	0.0016	1.6	63.264			11	11.0957	11.0981	0.0024	2.4	94.896		11	10.9509	10.9529	0.002	2	79.08
	12	11.4981	11.501	0.0029	2.9	114.666		12	9.1261	9.128	0.0019	1.9	75.126			12	16.4003	16.4021	0.0018	1.8	71.172		12	11.5161	11.5169	0.0008	0.8	31.632
	13	11.4894	11.4938	0.0044	4.4	173.976		13	11.4725	11.4748	0.0023	2.3	90.942			13	11.2016	11.2041	0.0025	2.5	98.85		13	11.2386	11.2394	0.0008	0.8	31.632
	14	9.1306	9.1343	0.0037	3.7	146.298		14	11.4902	11.492	0.0018	1.8	71.172			14	11.2614	11.2633	0.0019	1.9	75.126		14	9.1996	9.2004	0.0008	0.8	31.632
	15	11.4626	11.4669	0.0043	4.3	170.022		15	11.5863	11.5881	0.0018	1.8	71.172			15	9.0773	9.0793	0.002	2	79.08		15	11.0146	11.0156	0.001	1	39.54
	16	11.5571	11.5597	0.0026	2.6	102.804		16	11.4571	11.4583	0.0012	1.2	47.448			16	11.0523	11.0557	0.0034	3.4	134.436		16	11.0383	11.0398	0.0015	1.5	59.31
	17	11.5405	11.5441	0.0036	3.6	142.344		17	11.4904	11.492	0.0016	1.6	63.264			17	10.8956	10.8989	0.0033	3.3	130.482		17	11.2409	11.2428	0.0019	1.9	75.126
	18	11.5165	11.5198	0.0033	3.3	130.482		18	61.157	61.1591	0.0021	2.1	83.034			18	11.058	11.0595	0.0015	1.5	59.31		18	11.2317	11.233	0.0013	1.3	51.402
	19	55.6138	55.6165	0.0027	2.7	106.758		19	51.3449	51.3469	0.002	2	79.08			19	11.0354	11.0377	0.0023	2.3	90.942		19	11.0583	11.0597	0.0014	1.4	55.356
	20	62.8625	62.8661	0.0036	3.6	142.344		20	63.7944	63.796	0.0016	1.6	63.264			20	11.1555	11.1584	0.0029	2.9	114.666		20	11.0706	11.0724	0.0018	1.8	71.172
	21	63.2151	63.2189	0.0038	3.8	150.252		21	65.3289	65.3303	0.0014	1.4	55.356			21	11.1742	11.1757	0.0015	1.5	59.31		21	11.3456	11.3471	0.0015	1.5	59.31
	22	61.241	61.245	0.004	4	158.16		22	11.5583	11.5604	0.0021	2.1	83.034			22	11.133	11.1348	0.0018	1.8	71.172		22	11.125	11.1272	0.0022	1.5	59.31
	23	11.5132	11.5171	0.0039	3.9	154.206		23	11.4724	11.4739	0.0015	1.5	59.31			23	11.1228	11.1243	0.0015	1.5	59.31		23	11.1272	11.1284	0.0012	1.2	47.448
	24	11.4916	11.4947	0.0031	3.1	122.574		24	11.5016	11.5035	0.0019	1.9	75.126			24	11.4903	11.493	0.0027	2.7	106.758		24	11.5357	11.5364	0.0007	0.7	27.678
	25	11.3171	11.3199	0.0028	2.8	110.712		25	11.47	11.4713	0.0013	1.3	51.402			25	11.2633	11.265	0.0017	1.7	67.218		25	11.2226	11.2243	0.0017	1.7	67.218
	26	11.3001	11.3033	0.0032	3.2	126.528		26	11.172	11.1737	0.0017	1.7	67.218			26	11.094	11.0951	0.0011	1.1	43.494		26	11.2445	11.2455	0.001	1	39.54
	27	11.2343	11.2377	0.0034	3.4	134.436		27	11.1408	11.1424	0.0016	1.6	63.264			27	11.2597	11.262	0.0023	2.3	90.942		27	11.0525	11.0536	0.0011	1.1	43.494
	28	11.1445	11.1473	0.0028	2.8	110.712		28	11.314	11.3157	0.0017	1.7	67.218			28	11.1143	11.1175	0.0032	3.2	126.528		28	11.0558	11.0576	0.0018	1.8	71.172
	29	11.1395	11.1418	0.0023	2.3	90.942		29	11.1294	11.131	0.0016	1.6	63.264			29	11.1119	11.1147	0.0028	2.8	110.712		29	11.0747	11.0762	0.0015	1.5	59.31
	30	11.4595	11.4629	0.0034	3.4	134.436		30	11.1427	11.1441	0.0014	1.4	55.356			30	11.1884	11.1907	0.0023	2.3	90.942		30	11.0981	11.0996	0.0015	1.5	59.31
Mean				0.00311333	3.11333	123.101				Mean	0.00163667	1.63667	64.7138					Mean	0.0021	2.1	83.034				Mean	0.00125	1.19333	47.1844
s.d.				0.0006474	0.6474	25.5982				s.d.	0.000288257	0.288257	11.3977					s.d.	0.000652845	0.652845	25.8135				s.d.	0.000496019	0.419304	16.5793
Min				0.0019	1.9	75.126				Min	0.0011	1.1	43.494					Min	0.0034	3.4	134.436				Min	0.0023	2	79.08
Max				0.0044	4.4	173.976				Max	0.0023	2.3	90.942					Max	0.001	1	39.54				Max	0.0006	0.6	23.724

## Sheet: Protein
protein	23.69	joules				Pending	0.0021	sample dry weight	20											23.69	joul		Pending		0.0021	peso seco muestra	20	mg
						Intercept	0.2244																Intersept		0.2244
	Viscera									Muscle										Viscera									Muscle
	Sample	Absorbance	Concentration (µg/mL)	Dilution	Concentration * dilution (µg/mL)	Concentration (mg/mL)	Protein in 0,5 mL (mg)	Energy (J)		Sample	Absorbance	Concentration (µg/mL)	Dilution	Concentration * dilution (µg/mL)	Concentration (mg/mL)	Protein in 0,5 mL (mg)	Energy (J)		Coquimbo; NFU	Sample	Absorbance	Concentration (µg/mL)	Dilution	Concentration * dilution (µg/mL)	Concentration (mg/mL)	Protein in 0,5 mL (mg)	Energy (J)		Sample	Absorbance	Concentration (µg/mL)	Dilution	Concentration * dilution (µg/mL)	Concentration (mg/mL)	Protein in 0,5 mL (mg)	Energy (J)
Concepción; SFU	1	0.41	88.381	20	1767.62	1.76762	0.88381	20.9374		1	0.515	138.381	40	5535.24	5.53524	2.76762	65.5649			1	0.354	61.7143	20	1234.29	1.23429	0.617143	14.6201		1	0.41	88.381	20	1767.62	1.76762	0.88381	20.9374
	2	0.468	116	20	2320	2.32	1.16	27.4804		2	0.51	136	50	6800	6.8	3.4	80.546			2	0.362	65.5238	20	1310.48	1.31048	0.655238	15.5226		2	0.446	105.524	40	4220.95	4.22095	2.11048	49.9972
	3	0.466	115.048	20	2300.95	2.30095	1.15048	27.2548		3	0.517	139.333	40	5573.33	5.57333	2.78667	66.0161			3	0.358	63.619	20	1272.38	1.27238	0.63619	15.0714		3	0.443	104.095	20	2081.9	2.0819	1.04095	24.6602
	4	0.449	106.952	20	2139.05	2.13905	1.06952	25.337		4	0.513	137.429	20	2748.57	2.74857	1.37429	32.5568			4	0.396	81.7143	20	1634.29	1.63429	0.817143	19.3581		4	0.431	98.381	30	2951.43	2.95143	1.47571	34.9597
	5	0.437	101.238	20	2024.76	2.02476	1.01238	23.9833		5	0.528	144.571	40	5782.86	5.78286	2.89143	68.4979			5	0.435	100.286	20	2005.71	2.00571	1.00286	23.7577		5	0.433	99.3333	20	1986.67	1.98667	0.993333	23.5321
	6	0.438	101.714	20	2034.29	2.03429	1.01714	24.0961		6	0.536	148.381	20	2967.62	2.96762	1.48381	35.1514			6	0.466	115.048	20	2300.95	2.30095	1.15048	27.2548		6	0.476	119.81	30	3594.29	3.59429	1.79714	42.5743
	7	0.498	130.286	20	2605.71	2.60571	1.30286	30.8647		7	0.572	165.524	30	4965.71	4.96571	2.48286	58.8189			7	0.351	60.2857	30	1808.57	1.80857	0.904286	21.4225		7	0.408	87.4286	20	1748.57	1.74857	0.874286	20.7118
	8	0.531	146	20	2920	2.92	1.46	34.5874		8	0.538	149.333	30	4480	4.48	2.24	53.0656			8	0.374	71.2381	20	1424.76	1.42476	0.712381	16.8763		8	0.423	94.5714	20	1891.43	1.89143	0.945714	22.404
	9	0.46	112.19	20	2243.81	2.24381	1.1219	26.5779		9	0.487	125.048	30	3751.43	3.75143	1.87571	44.4357			9	0.491	126.952	20	2539.05	2.53905	1.26952	30.075		9	0.469	116.476	40	4659.05	4.65905	2.32952	55.1864
	10	0.441	103.143	20	2062.86	2.06286	1.03143	24.4345		10	0.496	129.333	50	6466.67	6.46667	3.23333	76.5977			10	0.378	73.1429	20	1462.86	1.46286	0.731429	17.3275		10	0.418	92.1905	20	1843.81	1.84381	0.921905	21.8399
	11	0.47	116.952	20	2339.05	2.33905	1.16952	27.706		11	0.475	119.333	50	5966.67	5.96667	2.98333	70.6752			11	0.462	113.143	20	2262.86	2.26286	1.13143	26.8035		11	0.406	86.4762	50	4323.81	4.32381	2.1619	51.2155
	12	0.423	94.5714	20	1891.43	1.89143	0.945714	22.404		12	0.503	132.667	50	6633.33	6.63333	3.31667	78.5718			12	0.406	86.4762	20	1729.52	1.72952	0.864762	20.4862		12	0.41	88.381	20	1767.62	1.76762	0.88381	20.9374
	13	0.524	142.667	20	2853.33	2.85333	1.42667	33.7977		13	0.473	118.381	50	5919.05	5.91905	2.95952	70.1111			13	0.479	121.238	20	2424.76	2.42476	1.21238	28.7213		13	0.416	91.2381	40	3649.52	3.64952	1.82476	43.2286
	14	0.497	129.81	20	2596.19	2.59619	1.2981	30.7519		14	0.532	146.476	50	7323.81	7.32381	3.6619	86.7505			14	0.486	124.571	20	2491.43	2.49143	1.24571	29.511		14	0.486	124.571	30	3737.14	3.73714	1.86857	44.2665
	15	0.51	136	20	2720	2.72	1.36	32.2184		15	0.471	117.429	50	5871.43	5.87143	2.93571	69.5471			15	0.432	98.8571	20	1977.14	1.97714	0.988571	23.4193		15	0.465	114.571	30	3437.14	3.43714	1.71857	40.713
	16	0.406	86.4762	20	1729.52	1.72952	0.864762	20.4862		16	0.437	101.238	50	5061.9	5.0619	2.53095	59.9583			16	0.479	121.238	20	2424.76	2.42476	1.21238	28.7213		16	0.455	109.81	50	5490.48	5.49048	2.74524	65.0347
	17	0.514	137.905	20	2758.1	2.7581	1.37905	32.6696		17	0.599	178.381	20	3567.62	3.56762	1.78381	42.2584			17	0.482	122.667	20	2453.33	2.45333	1.22667	29.0597		17	0.484	123.619	50	6180.95	6.18095	3.09048	73.2134
	18	0.547	153.619	20	3072.38	3.07238	1.53619	36.3924		18	0.537	148.857	20	2977.14	2.97714	1.48857	35.2643			18	0.371	69.8095	30	2094.29	2.09429	1.04714	24.8068		18	0.414	90.2857	50	4514.29	4.51429	2.25714	53.4717
	19	0.394	80.7619	20	1615.24	1.61524	0.807619	19.1325		19	0.581	169.81	20	3396.19	3.39619	1.6981	40.2279			19	0.452	108.381	20	2167.62	2.16762	1.08381	25.6754		19	0.475	119.333	30	3580	3.58	1.79	42.4051
	20	0.396	81.7143	20	1634.29	1.63429	0.817143	19.3581		20	0.535	147.905	20	2958.1	2.9581	1.47905	35.0386			20	0.455	109.81	20	2196.19	2.19619	1.0981	26.0139		20	0.471	117.429	50	5871.43	5.87143	2.93571	69.5471
	21	0.399	83.1429	20	1662.86	1.66286	0.831429	19.6965		21	0.574	166.476	20	3329.52	3.32952	1.66476	39.4382			21	0.478	120.762	20	2415.24	2.41524	1.20762	28.6085		21	0.404	85.5238	50	4276.19	4.27619	2.1381	50.6515
	22	0.413	89.8095	20	1796.19	1.79619	0.898095	21.2759		22	0.578	168.381	20	3367.62	3.36762	1.68381	39.8894			22	0.386	76.9524	20	1539.05	1.53905	0.769524	18.23		22	0.461	112.667	30	3380	3.38	1.69	40.0361
	23	0.435	100.286	20	2005.71	2.00571	1.00286	23.7577		23	0.455	109.81	30	3294.29	3.29429	1.64714	39.0208			23	0.411	88.8571	20	1777.14	1.77714	0.888571	21.0503		23	0.451	107.905	50	5395.24	5.39524	2.69762	63.9066
	24	0.558	158.857	20	3177.14	3.17714	1.58857	37.6333		24	0.573	166	20	3320	3.32	1.66	39.3254			24	0.473	118.381	20	2367.62	2.36762	1.18381	28.0444		24	0.416	91.2381	50	4561.9	4.5619	2.28095	54.0358
	25	0.515	138.381	20	2767.62	2.76762	1.38381	32.7824		25	0.512	136.952	40	5478.1	5.4781	2.73905	64.888			25	0.487	125.048	20	2500.95	2.50095	1.25048	29.6238		25	0.489	126	40	5040	5.04	2.52	59.6988
	26	0.494	128.381	20	2567.62	2.56762	1.28381	30.4134		26	0.544	152.19	40	6087.62	6.08762	3.04381	72.1078			26	0.365	66.9524	20	1339.05	1.33905	0.669524	15.861		26	0.459	111.714	20	2234.29	2.23429	1.11714	26.4651
	27	0.551	155.524	20	3110.48	3.11048	1.55524	36.8436		27	0.469	116.476	50	5823.81	5.82381	2.9119	68.983			27	0.413	89.8095	20	1796.19	1.79619	0.898095	21.2759		27	0.437	101.238	20	2024.76	2.02476	1.01238	23.9833
	28	0.441	103.143	20	2062.86	2.06286	1.03143	24.4345		28	0.491	126.952	50	6347.62	6.34762	3.17381	75.1875			28	0.37	69.3333	20	1386.67	1.38667	0.693333	16.4251		28	0.411	88.8571	50	4442.86	4.44286	2.22143	52.6256
	29	0.469	116.476	20	2329.52	2.32952	1.16476	27.5932		29	0.575	166.952	30	5008.57	5.00857	2.50429	59.3265			29	0.451	107.905	20	2158.1	2.1581	1.07905	25.5626		29	0.418	92.1905	50	4609.52	4.60952	2.30476	54.5998
	30	0.429	97.4286	20	1948.57	1.94857	0.974286	23.0808		30	0.558	158.857	20	3177.14	3.17714	1.58857	37.6333			30	0.468	116	20	2320	2.32	1.16	27.4804		30	0.429	97.4286	20	1948.57	1.94857	0.974286	23.0808
					Mean	2.3019	1.15095	27.2661						Mean	4.79937	2.39968	56.8485							Mean	1.98555	0.992775	23.5188						Mean	3.57371	1.78686	42.3306
					s.d.	0.47049	0.235245	5.57296						s.d.	1.41851	0.709256	16.8023							s.d.	0.422516	0.211258	5.0047						s.d.	1.38083	0.690417	16.356
					min	1.61524	0.807619	19.1325						min	2.74857	1.37429	32.5568							min	1.27238	0.63619	15.0714						min	1.74857	0.874286	20.7118
					max	3.17714	1.58857	37.6333						max	7.32381	3.6619	86.7505							max	2.53905	1.26952	30.075						max	6.18095	3.09048	73.2134

## Sheet: Glucose
		Glucose energy	17.15		Standard	0.177			Standard	0.181		Standard	0.186	Peso seco muestra	20	mg				Standard	0.188		Standard	0.164			Standard	0.186	sample dry weight	20	mg	17.15	joules
		Viscera							Muscle								Viscera							Muscle
	Concepción; SFU	Sample	absorbance	glucose concentration mg /dL	glucose concentration mg/mL	Glucose (mg)	Energy (J)		Sample	absorbance	glucose concentration mg /dL	glucose concentration mg/mL	Glucose (mg)	Energy (J)		Coquimbo; NFU	Sample	absorbance	glucose concentration mg /dL	glucose concentration mg/mL	Glucose (mg)	Energy (J)		Sample	absorbance	glucose concentration mg /dL	glucose concentration mg/mL	Glucose (mg)	Energy (J)
		1	0.034	19.209	0.19209	0.0768362	1.31774		1	0.031	17.5141	0.175141	0.0700565	1.20147			1	0.037	19.6809	0.196809	0.0787234	1.35011		1	0.038	20.2128	0.202128	0.0808511	1.3866
		2	0.027	15.2542	0.152542	0.0610169	1.04644		2	0.048	27.1186	0.271186	0.108475	1.86034			2	0.035	18.617	0.18617	0.0744681	1.27713		2	0.028	14.8936	0.148936	0.0595745	1.0217
		3	0.066	37.2881	0.372881	0.149153	2.55797		3	0.055	31.0734	0.310734	0.124294	2.13164			3	0.015	7.97872	0.0797872	0.0319149	0.54734		3	0.036	19.1489	0.191489	0.0765957	1.31362
		4	0.03	16.9492	0.169492	0.0677966	1.16271		4	0.022	12.4294	0.124294	0.0497175	0.852655			4	0.025	15.2439	0.152439	0.0609756	1.04573		4	0.029	17.6829	0.176829	0.0707317	1.21305
		5	0.032	18.0791	0.180791	0.0723164	1.24023		5	0.054	30.5085	0.305085	0.122034	2.09288			5	0.018	10.9756	0.109756	0.0439024	0.752927		5	0.017	10.3659	0.103659	0.0414634	0.711098
		6	0.044	24.8588	0.248588	0.099435	1.70531		6	0.026	14.6893	0.146893	0.0587571	1.00768			6	0.02	12.1951	0.121951	0.0487805	0.836585		6	0.021	12.8049	0.128049	0.0512195	0.878415
		7	0.04	22.5989	0.225989	0.0903955	1.55028		7	0.021	11.8644	0.118644	0.0474576	0.813898			7	0.033	20.122	0.20122	0.0804878	1.38037		7	0.016	9.7561	0.097561	0.0390244	0.669268
		8	0.031	17.1271	0.171271	0.0685083	1.17492		8	0.028	15.4696	0.154696	0.0618785	1.06122			8	0.01	5.37634	0.0537634	0.0215054	0.368817		8	0.012	6.45161	0.0645161	0.0258065	0.442581
		9	0.042	23.2044	0.232044	0.0928177	1.59182		9	0.025	13.8122	0.138122	0.0552486	0.947514			9	0.016	8.60215	0.0860215	0.0344086	0.590108		9	0.021	11.2903	0.112903	0.0451613	0.774516
		10	0.045	24.8619	0.248619	0.0994475	1.70552		10	0.022	12.1547	0.121547	0.0486188	0.833812			10	0.011	5.91398	0.0591398	0.0236559	0.405699		10	0.02	10.7527	0.107527	0.0430108	0.737634
		11	0.028	15.4696	0.154696	0.0618785	1.06122		11	0.04	22.0994	0.220994	0.0883978	1.51602			11	0.031	16.4894	0.164894	0.0659574	1.13117		11	0.035	18.617	0.18617	0.0744681	1.27713
		12	0.035	19.337	0.19337	0.0773481	1.32652		12	0.021	11.6022	0.116022	0.0464088	0.795912			12	0.037	19.6809	0.196809	0.0787234	1.35011		12	0.028	14.8936	0.148936	0.0595745	1.0217
		13	0.039	21.547	0.21547	0.0861878	1.47812		13	0.025	13.8122	0.138122	0.0552486	0.947514			13	0.01	5.31915	0.0531915	0.0212766	0.364894		13	0.036	19.1489	0.191489	0.0765957	1.31362
		14	0.055	29.5699	0.295699	0.11828	2.02849		14	0.055	29.5699	0.295699	0.11828	2.02849			14	0.027	16.4634	0.164634	0.0658537	1.12939		14	0.033	20.122	0.20122	0.0804878	1.38037
		15	0.034	18.2796	0.182796	0.0731183	1.25398		15	0.034	18.2796	0.182796	0.0731183	1.25398			15	0.032	19.5122	0.195122	0.0780488	1.33854		15	0.017	10.3659	0.103659	0.0414634	0.711098
		16	0.05	26.8817	0.268817	0.107527	1.84409		16	0.02	10.7527	0.107527	0.0430108	0.737634			16	0.017	10.3659	0.103659	0.0414634	0.711098		16	0.018	10.9756	0.109756	0.0439024	0.752927
		17	0.032	17.2043	0.172043	0.0688172	1.18022		17	0.027	14.5161	0.145161	0.0580645	0.995806			17	0.028	17.0732	0.170732	0.0682927	1.17122		17	0.016	9.7561	0.097561	0.0390244	0.669268
		18	0.034	18.2796	0.182796	0.0731183	1.25398		18	0.053	28.4946	0.284946	0.113978	1.95473			18	0.014	7.52688	0.0752688	0.0301075	0.516344		18	0.015	8.06452	0.0806452	0.0322581	0.553226
		19	0.054	29.0323	0.290323	0.116129	1.99161		19	0.029	15.5914	0.155914	0.0623656	1.06957			19	0.012	6.45161	0.0645161	0.0258065	0.442581		19	0.023	12.3656	0.123656	0.0494624	0.84828
		20	0.049	26.3441	0.263441	0.105376	1.8072		20	0.046	24.7312	0.247312	0.0989247	1.69656			20	0.038	20.4301	0.204301	0.0817204	1.40151		20	0.037	19.8925	0.198925	0.0795699	1.36462
		21	0.042	22.5806	0.225806	0.0903226	1.54903		21	0.056	30.1075	0.301075	0.12043	2.06538			21	0.021	11.2903	0.112903	0.0451613	0.774516		21	0.021	11.2903	0.112903	0.0451613	0.774516
		22	0.031	16.6667	0.166667	0.0666667	1.14333		22	0.02	10.7527	0.107527	0.0430108	0.737634			22	0.013	6.98925	0.0698925	0.027957	0.479462		22	0.015	8.06452	0.0806452	0.0322581	0.553226
		23	0.057	30.6452	0.306452	0.122581	2.10226		23	0.052	27.957	0.27957	0.111828	1.91785			23	0.028	15.0538	0.150538	0.0602151	1.03269		23	0.03	16.129	0.16129	0.0645161	1.10645
		24	0.065	34.9462	0.349462	0.139785	2.39731		24	0.021	11.2903	0.112903	0.0451613	0.774516			24	0.039	20.9677	0.209677	0.083871	1.43839		24	0.019	10.2151	0.102151	0.0408602	0.700753
		25	0.035	18.8172	0.188172	0.0752688	1.29086		25	0.03	16.129	0.16129	0.0645161	1.10645			25	0.017	9.13978	0.0913978	0.0365591	0.626989		25	0.035	18.8172	0.188172	0.0752688	1.29086
		26	0.029	15.5914	0.155914	0.0623656	1.06957		26	0.025	13.4409	0.134409	0.0537634	0.922043			26	0.015	8.06452	0.0806452	0.0322581	0.553226		26	0.041	22.043	0.22043	0.088172	1.51215
		27	0.044	23.6559	0.236559	0.0946237	1.6228		27	0.026	13.9785	0.139785	0.055914	0.958925			27	0.01	5.37634	0.0537634	0.0215054	0.368817		27	0.017	9.13978	0.0913978	0.0365591	0.626989
		28	0.032	17.2043	0.172043	0.0688172	1.18022		28	0.02	10.7527	0.107527	0.0430108	0.737634			28	0.036	19.3548	0.193548	0.0774194	1.32774		28	0.017	9.13978	0.0913978	0.0365591	0.626989
		29	0.038	20.4301	0.204301	0.0817204	1.40151		29	0.031	16.6667	0.166667	0.0666667	1.14333			29	0.039	20.9677	0.209677	0.083871	1.43839		29	0.022	11.828	0.11828	0.0473118	0.811398
		30	0.049	26.3441	0.263441	0.105376	1.8072		30	0.045	24.1935	0.241935	0.0967742	1.65968			30	0.012	6.45161	0.0645161	0.0258065	0.442581		30	0.013	6.98925	0.0698925	0.027957	0.479462
		Mean	0.0407667	22.2752	0.222752	0.089101	1.52808		Mean	0.0336	18.3784	0.183784	0.0735136	1.26076			Mean	0.0232	12.9225	0.129225	0.0516899	0.886482		Mean	0.0242	13.3739	0.133739	0.0534956	0.91745
		s.d.	0.0107821	5.83402	0.0583402	0.0233361	0.400213		s.d.	0.0129204	7.08504	0.0708504	0.0283401	0.486034			s.d.	0.0103671	5.75973	0.0575973	0.0230389	0.395118		s.d.	0.00874308	4.64147	0.0464147	0.0185659	0.318405
		min	0.027	15.2542	0.152542	0.0610169	1.04644		min	0.02	10.7527	0.107527	0.0430108	0.737634			min	0.01	5.31915	0.0531915	0.0212766	0.364894		min	0.012	6.45161	0.0645161	0.0258065	0.442581
		max	0.066	37.2881	0.372881	0.149153	2.55797		max	0.056	31.0734	0.310734	0.124294	2.13164			max	0.039	20.9677	0.209677	0.083871	1.43839		max	0.041	22.043	0.22043	0.088172	1.51215

## Sheet: Energy
		Viscera					Muscle						Viscera					Muscle
	Concepción; SFU	Protein energy	Glucose energy	Lipid energy	Total energy		Protein energy	Glucose energy	Lipid energy	Total energy		Coquimbo; NFU	Protein energy	Glucose energy	Lipid energy	Total energy		Protein energy	Glucose energy	Lipid energy	Total energy
		20.9374	1.31774	94.896	117.151		65.5649	1.20147	51.402	118.168			23.7577	1.35011	39.54	64.6478		51.2155	1.3866	27.678	80.2801
		27.4804	1.04644	106.758	135.285		80.546	1.86034	55.356	137.762			28.7213	1.27713	83.034	113.032		49.9972	1.0217	47.448	98.4669
		27.2548	2.55797	118.62	148.433		66.0161	2.13164	55.356	123.504			28.6085	0.54734	98.85	128.006		69.5471	1.31362	55.356	126.217
		25.337	1.16271	75.126	101.626		68.4979	0.852655	43.494	112.845			19.3581	1.04573	63.264	83.6678		34.9597	1.21305	35.586	71.7587
		23.9833	1.24023	83.034	108.258		32.5568	2.09288	47.448	82.0977			14.6201	0.752927	43.494	58.867		23.5321	0.711098	27.678	51.9212
		24.0961	1.70531	142.344	168.145		35.1514	1.00768	67.218	103.377			27.2548	0.836585	51.402	79.4934		42.5743	0.878415	51.402	94.8547
		30.8647	1.55028	130.482	162.897		58.8189	0.813898	67.218	126.851			21.4225	1.38037	102.804	125.607		50.6515	0.669268	23.724	75.0447
		34.5874	1.17492	114.666	150.428		53.0656	1.06122	71.172	125.299			26.0139	0.368817	79.08	105.463		54.0358	0.442581	23.724	78.2023
		26.5779	1.59182	94.896	123.066		44.4357	0.947514	71.172	116.555			30.075	0.590108	67.218	97.8831		55.1864	0.774516	31.632	87.5929
		24.4345	1.70552	86.988	113.128		76.5977	0.833812	63.264	140.695			17.3275	0.405699	86.988	104.721		21.8399	0.737634	31.632	54.2096
		27.706	1.06122	122.574	151.341		70.6752	1.51602	63.264	135.455			15.861	1.13117	94.896	111.888		20.9374	1.27713	79.08	101.295
		22.404	1.32652	114.666	138.396		78.5718	0.795912	75.126	154.494			20.4862	1.35011	71.172	93.0083		40.0361	1.0217	31.632	72.6898
		33.7977	1.47812	173.976	209.252		70.1111	0.947514	90.942	162.001			28.7213	0.364894	98.85	127.936		43.2286	1.31362	31.632	76.1742
		30.7519	2.02849	146.298	179.078		86.7505	2.02849	71.172	159.951			29.511	1.12939	75.126	105.766		44.2665	1.38037	31.632	77.2788
		32.2184	1.25398	170.022	203.494		69.5471	1.25398	71.172	141.973			23.4193	1.33854	79.08	103.838		40.713	0.711098	39.54	80.9641
		20.4862	1.84409	102.804	125.134		59.9583	0.737634	47.448	108.144			15.5226	0.711098	134.436	150.67		65.0347	0.752927	59.31	125.098
		32.6696	1.18022	142.344	176.194		42.2584	0.995806	63.264	106.518			29.0597	1.17122	130.482	160.713		63.9066	0.669268	75.126	139.702
		36.3924	1.25398	130.482	168.128		35.2643	1.95473	83.034	120.253			24.8068	0.516344	59.31	84.6332		53.4717	0.553226	51.402	105.427
		19.1325	1.99161	106.758	127.882		40.2279	1.06957	79.08	120.377			25.6754	0.442581	90.942	117.06		42.4051	0.84828	55.356	98.6094
		19.3581	1.8072	142.344	163.509		35.0386	1.69656	63.264	99.9992			16.8763	1.40151	114.666	132.944		24.6602	1.36462	71.172	97.1968
		19.6965	1.54903	150.252	171.498		39.4382	2.06538	55.356	96.8596			15.0714	0.774516	59.31	75.1559		20.7118	0.774516	59.31	80.7963
		21.2759	1.14333	158.16	180.579		39.8894	0.737634	83.034	123.661			18.23	0.479462	71.172	89.8815		20.9374	0.553226	59.31	80.8007
		23.7577	2.10226	154.206	180.066		39.0208	1.91785	59.31	100.249			21.0503	1.03269	59.31	81.3929		73.2134	1.10645	47.448	121.768
		37.6333	2.39731	122.574	162.605		39.3254	0.774516	75.126	115.226			28.0444	1.43839	106.758	136.241		22.404	0.700753	27.678	50.7827
		32.7824	1.29086	110.712	144.785		64.888	1.10645	51.402	117.396			29.6238	0.626989	67.218	97.4688		59.6988	1.29086	67.218	128.208
		30.4134	1.06957	126.528	158.011		72.1078	0.922043	67.218	140.248			26.8035	0.553226	43.494	70.8508		26.4651	1.51215	39.54	67.5173
		36.8436	1.6228	134.436	172.902		68.983	0.958925	63.264	133.206			21.2759	0.368817	90.942	112.587		23.9833	0.626989	43.494	68.1043
		24.4345	1.18022	110.712	136.327		75.1875	0.737634	67.218	143.143			16.4251	1.32774	126.528	144.281		52.6256	0.626989	71.172	124.425
		27.5932	1.40151	90.942	119.937		59.3265	1.14333	63.264	123.734			25.5626	1.43839	110.712	137.713		54.5998	0.811398	59.31	114.721
		23.0808	1.8072	134.436	159.324		37.6333	1.65968	55.356	94.6489			27.4804	0.442581	90.942	118.865		23.0808	0.479462	59.31	82.8703
Mean		27.2661	1.52808	123.101	151.895		56.8485	1.26076	64.7138	122.823		Mean	23.2222	0.886482	83.034	107.143		42.3306	0.91745	47.1844	90.4325
s.d.		5.57296	0.400213	25.5982	27.3964		16.8023	0.486034	11.3977	19.5736		s.d.	5.17908	0.395118	25.8135	26.1179		16.356	0.318405	16.5793	24.1148
Min.		19.1325	1.04644	75.126	101.626		32.5568	0.737634	43.494	82.0977		Min.	14.6201	0.364894	39.54	58.867		20.7118	0.442581	23.724	50.7827
Max.		37.6333	2.55797	173.976	209.252		86.7505	2.13164	90.942	162.001		Max.	30.075	1.43839	134.436	160.713		73.2134	1.51215	79.08	139.702

## Sheet: ratio
		Concepción; SFU					Coquimbo; NFU						Concepción; SFU					Coquimbo; NFU
		Vicera	Vicera				Viscera	Viscera					Muscle	Muscle				Muscle	Muscle
	Sample	Lipid (mg)	Protein (mg)	L/P ratio		Sample	Lipid (mg)	Protein (mg)	L/P ratio			Sample	Lipid (mg)	Protein (mg)	L/P ratio		Sample	Lipid (mg)	Protein (mg)	L/P ratio
	1	2.4	0.88381	2.71552		1	1	0.617143	1.62037			1	1.3	2.76762	0.469718		1	0.7	0.88381	0.792026
	2	2.7	1.16	2.32759		2	2.1	0.655238	3.20494			2	1.4	3.4	0.411765		2	1.2	2.11048	0.568592
	3	3	1.15048	2.60762		3	2.5	0.63619	3.92964			3	1.4	2.78667	0.502392		3	1.4	1.04095	1.34492
	4	1.9	1.06952	1.77649		4	1.6	0.817143	1.95804			4	1.1	1.37429	0.800416		4	0.9	1.47571	0.609874
	5	2.1	1.01238	2.07432		5	1.1	1.00286	1.09687			5	1.2	2.89143	0.41502		5	0.7	0.993333	0.704698
	6	3.6	1.01714	3.53933		6	1.3	1.15048	1.12997			6	1.7	1.48381	1.1457		6	1.3	1.79714	0.72337
	7	3.3	1.30286	2.53289		7	2.6	0.904286	2.8752			7	1.7	2.48286	0.684695		7	0.6	0.874286	0.686275
	8	2.9	1.46	1.9863		8	2	0.712381	2.80749			8	1.8	2.24	0.803571		8	0.6	0.945714	0.634441
	9	2.4	1.1219	2.13922		9	1.7	1.26952	1.33908			9	1.8	1.87571	0.959634		9	0.8	2.32952	0.343418
	10	2.2	1.03143	2.13296		10	2.2	0.731429	3.00781			10	1.6	3.23333	0.494845		10	0.8	0.921905	0.867769
	11	3.1	1.16952	2.65065		11	2.4	1.13143	2.12121			11	1.6	2.98333	0.536313		11	2	2.1619	0.92511
	12	2.9	0.945714	3.06647		12	1.8	0.864762	2.0815			12	1.9	3.31667	0.572864		12	0.8	0.88381	0.905172
	13	4.4	1.42667	3.08411		13	2.5	1.21238	2.06206			13	2.3	2.95952	0.777152		13	0.8	1.82476	0.438413
	14	3.7	1.2981	2.85033		14	1.9	1.24571	1.52523			14	1.8	3.6619	0.491547		14	0.8	1.86857	0.428135
	15	4.3	1.36	3.16176		15	2	0.988571	2.02312			15	1.8	2.93571	0.613139		15	1	1.71857	0.581879
	16	2.6	0.864762	3.00661		16	3.4	1.21238	2.8044			16	1.2	2.53095	0.47413		16	1.5	2.74524	0.546401
	17	3.6	1.37905	2.6105		17	3.3	1.22667	2.69022			17	1.6	1.78381	0.896957		17	1.9	3.09048	0.614792
	18	3.3	1.53619	2.14817		18	1.5	1.04714	1.43247			18	2.1	1.48857	1.41075		18	1.3	2.25714	0.575949
	19	2.7	0.807619	3.34316		19	2.3	1.08381	2.12214			19	2	1.6981	1.17779		19	1.4	1.79	0.782123
	20	3.6	0.817143	4.40559		20	2.9	1.0981	2.64094			20	1.6	1.47905	1.08178		20	1.8	2.93571	0.613139
	21	3.8	0.831429	4.57045		21	1.5	1.20762	1.24211			21	1.4	1.66476	0.840961		21	1.5	2.1381	0.701559
	22	4	0.898095	4.45387		22	1.8	0.769524	2.33911			22	2.1	1.68381	1.24717		22	1.5	1.69	0.887574
	23	3.9	1.00286	3.88889		23	1.5	0.888571	1.6881			23	1.5	1.64714	0.910668		23	1.2	2.69762	0.444837
	24	3.1	1.58857	1.95144		24	2.7	1.18381	2.28077			24	1.9	1.66	1.14458		24	0.7	2.28095	0.306889
	25	2.8	1.38381	2.0234		25	1.7	1.25048	1.35948			25	1.3	2.73905	0.474618		25	1.7	2.52	0.674603
	26	3.2	1.28381	2.49258		26	1.1	0.669524	1.64296			26	1.7	3.04381	0.558511		26	1	1.11714	0.895141
	27	3.4	1.55524	2.18616		27	2.3	0.898095	2.56098			27	1.6	2.9119	0.549469		27	1.1	1.01238	1.08655
	28	2.8	1.03143	2.71468		28	3.2	0.693333	4.61538			28	1.7	3.17381	0.535634		28	1.8	2.22143	0.810289
	29	2.3	1.16476	1.97465		29	2.8	1.07905	2.59488			29	1.6	2.50429	0.638905		29	1.5	2.30476	0.650826
	30	3.4	0.974286	3.48974		30	2.3	1.16	1.98276			30	1.4	1.58857	0.881295		30	1.5	0.974286	1.53959
		Mean		2.79685				Mean	2.22597					Mean	0.750066				Mean	0.722812
		s.d.		0.781264				s.d.	0.815099					s.d.	0.281478				s.d.	0.266948

## Sheet: Codebook
	Code	Meaning
	CL	Cephalotorax length
	TDW	Total dry weight
	SFU	Southern Fishing Unit
	NFU	Northern Fishing Unit
	S.D.	Standard deviation
	L/P ratio	Lipid and Protein ratio
